# Supplementary material for: Deletion of NGG1 in a recombinant Saccharomyces cerevisiae improved xylose utilization and affected transcription of genes related to amino acid metabolism
Source: Frontiers journal article supplement (doi:10.3389/fmicb.2022.960114), 2022-09-08
Supplement: Data_Sheet_1.pdf [file Data_Sheet_1.pdf]

**Table S1** Yeast strains used in this study

| Yeast strain          | Genotype                                                                                                                                                                                        | Source                   |
|-----------------------|-------------------------------------------------------------------------------------------------------------------------------------------------------------------------------------------------|--------------------------|
| S288c                 | <i>S. cerevisiae</i> , laboratory strain                                                                                                                                                        | Stored in our lab        |
| YB-2625               | <i>S. cerevisiae</i> isolated from bagasse                                                                                                                                                      | NRRL                     |
| YRH396                | YB-2625 <i>hoΔ::</i> (KanMX4; P <sub>PGK1</sub> - <i>XYL1</i> -T <sub>PGK1</sub> ;<br>P <sub>ADH1</sub> - <i>XYL2</i> -T <sub>ADH1</sub> ; P <sub>HXT7</sub> - <i>XKS1</i> -T <sub>HXT7</sub> ) | (Hector et al.,<br>2011) |
| YRH396h               | Haploid of YRH396                                                                                                                                                                               | This work                |
| YRH396h- <i>ngg1Δ</i> | YRH396h <i>ngg1Δ::</i> HphMX                                                                                                                                                                    | This work                |

**Table S2** Primers used in this study for gene manipulation and verification

| Primer name     | Sequence 5'-3'                                                         |
|-----------------|------------------------------------------------------------------------|
| <i>ngg1</i> Δ-F | ATGCCTAGACATGGAAGAAGAGGAAAAGTCCAAAAGGCGCAG<br><u>CGACATGGAGGCCAG</u>   |
| <i>ngg1</i> Δ-R | TTAATTTAGTTCCACGTCCTTATTAGTGTTTTGTGCAAATCGTCCC<br><u>AAAACCTTCTCAA</u> |
| hph-in-R        | TGGTCAAGACCAATGCGGAG                                                   |
| NGG1-F          | ATGCCTAGACATGGAAG                                                      |

The underlined sequence was homologous arm of HphMX marker.

**Table S3** Primers for real-time quantitative PCR analysis

| Primer name         | Sequence 5'-3'           |
|---------------------|--------------------------|
| RT- <i>XYL1</i> -F  | GAGGTGCTACCATCAAGCCATCTG |
| RT- <i>XYL1</i> -R  | CGAACGAAGAGTAAGCGGTGACAG |
| RT- <i>XYL2</i> -F  | TCGCCGCTACTCCTAACTCCAAG  |
| RT- <i>XYL2</i> -R  | TCAACAAGAGCACCGAGTTCCAAG |
| RT- <i>XKS1</i> -F  | AGCACGGGTCTGTCTACTGG     |
| RT- <i>XKS1</i> -R  | AGGCCACCTATGCACTCTT      |
| RT- <i>SOD1</i> -F  | TGTCTCTGCTGGTCCTCACTTC   |
| RT- <i>SOD1</i> -R  | CACACCATTTTCGTCCGTCTT    |
| RT- <i>PRX1</i> -F  | TCGACGCCTTGCAATTGACTGAC  |
| RT- <i>PRX1</i> -R  | GCCTTCGCCTCATCATTGGAGAC  |
| RT- <i>CTT1</i> -F  | CAATTGCCCCGTCAACAGA      |
| RT- <i>CTT1</i> -R  | ATTGGGCTCAGGACCGAA       |
| RT- <i>ASK10</i> -F | ATGACGCCTCCTCCATCCACTC   |
| RT- <i>ASK10</i> -R | TCCGTAGTAGAGGTTGGCTGAGC  |

**Table S4** Comparison of fold changes of selected genes between RNA-seq and qPCR analyses

| Gene          | RT-qPCR analysis | RNA-seq analysis |
|---------------|------------------|------------------|
| <i>XYL1</i> * | 1.90             | ND               |
| <i>XYL2</i> * | 1.11             | ND               |
| <i>XKS1</i>   | 0.49             | 0.45             |
| <i>SOD1</i>   | 1.25             | ND               |
| <i>PRX1</i>   | 0.59             | 0.46             |
| <i>CTT1</i>   | 1.89             | 1.72             |
| <i>ASK10</i>  | 0.67             | 0.56             |

\* These two genes are not present in the genome of S288c. The qPCR and RNA-seq results were all calculated by the  $2^{-\Delta\Delta C_t}$  method. ND: No significant difference of this gene was found in the RNA-seq analysis between YRH396h-*ngg1* $\Delta$  and YRH396h.

**Table S5** Fold change of xylose metabolism relative genes between YRH396h-*ngg1*Δ and YRH396h

| Gene          | Log <sub>2</sub> YRH396h-<br><i>ngg1</i> Δ/YRH396h ratio |
|---------------|----------------------------------------------------------|
| <i>ASK10</i>  | -0.84                                                    |
| <i>HSP26</i>  | ND                                                       |
| <i>SSA1</i>   | ND                                                       |
| <i>HSP104</i> | ND                                                       |
| <i>HOG1</i>   | ND                                                       |
| <i>GRE3</i>   | ND                                                       |
| <i>IRA2</i>   | -0.80                                                    |
| <i>ISU1</i>   | -0.83                                                    |
| <i>SSK2</i>   | -0.52                                                    |
| <i>CAT8</i>   | -0.93                                                    |
| <i>HAP4</i>   | ND                                                       |
| <i>ADR1</i>   | -1.11                                                    |
| <i>MSN2</i>   | ND                                                       |
| <i>MSN4</i>   | 0.67                                                     |
| <i>GIS1</i>   | -1.03                                                    |
| <i>AFT2</i>   | ND                                                       |
| <i>USV1</i>   | -0.53                                                    |
| <i>SNF1</i>   | ND                                                       |

ND: No significant difference of this gene was found in the RNA-seq analysis between YRH396h-*ngg1*Δ and YRH396h.

**Figure legends for the supplementary data**

**Figure S1 Changed lysine acetylation level of YRH396h exerted by *NGG1* deficiency.** The cell extracts from YRH396h-*ngg1*Δ and YRH396h grown in YPX medium at log phase were separated by SDS-PAGE respectively. The samples were determined by western blot using anti-acetyllysine antibody (1:1000) as the primary antibody and goat anti-mouse IgG (1:5000) as the 2nd antibody. The arrows indicate different immunoblot signals between the two strains.

**Figure S2. Growth ability of different haploids derived from YRH396 in xylose or mixed-sugar.** The sixteen haploid isolates (bars No. 1-16) and diploid YRH396 (bar No. 0) were cultivated in 48 deep-well baffled plates by 10% of inoculation in 1 mL YPX40 (A) or YPD80X40 (B) medium to determine the growth ability. The mixed-sugar medium (YPD80X40) composed of 4 g/L yeast extract, 3 g/L peptone, 80 g/L glucose, and 40 g/L xylose, while 40 g/L xylose was used as sole carbon source in YPX40 medium. After cultured at 220 rpm and 30°C for 96 h, the cell growth ability was determined by OD<sub>600</sub>. The orange bar stand for YRH396h.

**Figure S3. Top 20 enriched transcription factors regulating the significantly changed genes between the transcriptomic profile of YRH396h-*ngg1*Δ and the control strain YRH396h during xylose fermentation.** Enriched transcription factors were analyzed with differentially expressed genes ( $\text{Log}_2$  ratio  $\geq 0.5$  or  $\leq -0.5$ ,  $\text{FDR} \leq 0.001$ ). Yeast strain with *NGG1* deletion and its parent strain *S. cerevisiae* YRH396h were grown in YPX liquid medium using xylose as the sole carbon source, and culture broth was collected at the designated time point. The value of y-axis indicated the percentage of changed genes regulated by transcription factors.

**Figure S4. Enriched categories of obviously down-regulated genes between YRH396h-*ngg1*Δ and the control strain YRH396h.** Gene Ontology (GO) enrichment was analyzed with differentially expressed genes ( $\text{Log}_2$  ratio  $\leq -0.5$ ,  $\text{FDR} \leq 0.001$ ). (A) **Molecular Function (MF)**-1. oxidoreductase

activity, 2. catalytic activity, 3. glutathione transferase activity, 4. peroxidase activity, 5. succinate dehydrogenase activity, 6. glutathione peroxidase activity, 7. electron carrier activity, 8. proton-transporting ATPase activity, 9. transporter activity, 10. metal ion binding; **(B) Biological Process (BP)**-1. oxidation-reduction process, 2. tricarboxylic acid cycle, 3. ATP biosynthetic process, 4. electron transport chain, 5. ergosterol biosynthetic process, 6. cellular carbohydrate metabolic process, 7. ion transport, 8. NADPH regeneration, 9. cellular response to oxidative stress, 10. carbohydrate metabolic process; **(C) Cellular Component (CC)** -1. mitochondrion, 2. membrane, 3. integral to membrane, 4. mitochondrial nucleoid, 5. plasma membrane, 6. mitochondrial inner membrane, 7. ATP synthase complex, 8. mitochondrial matrix, 9. mitochondrial intermembrane space, 10. respiratory chain.

**Figure S5. Regulators and target genes of *NGG1*.** The interaction network was obtained by SGD. Regulators of *NGG1* are marked in green, and purple nodes stand for target genes of *NGG1*.

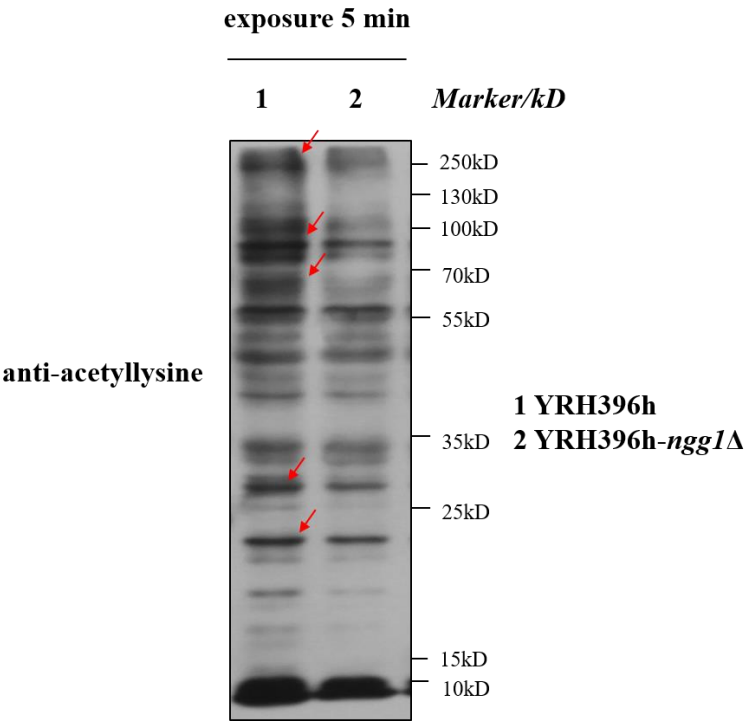

Fig. S1



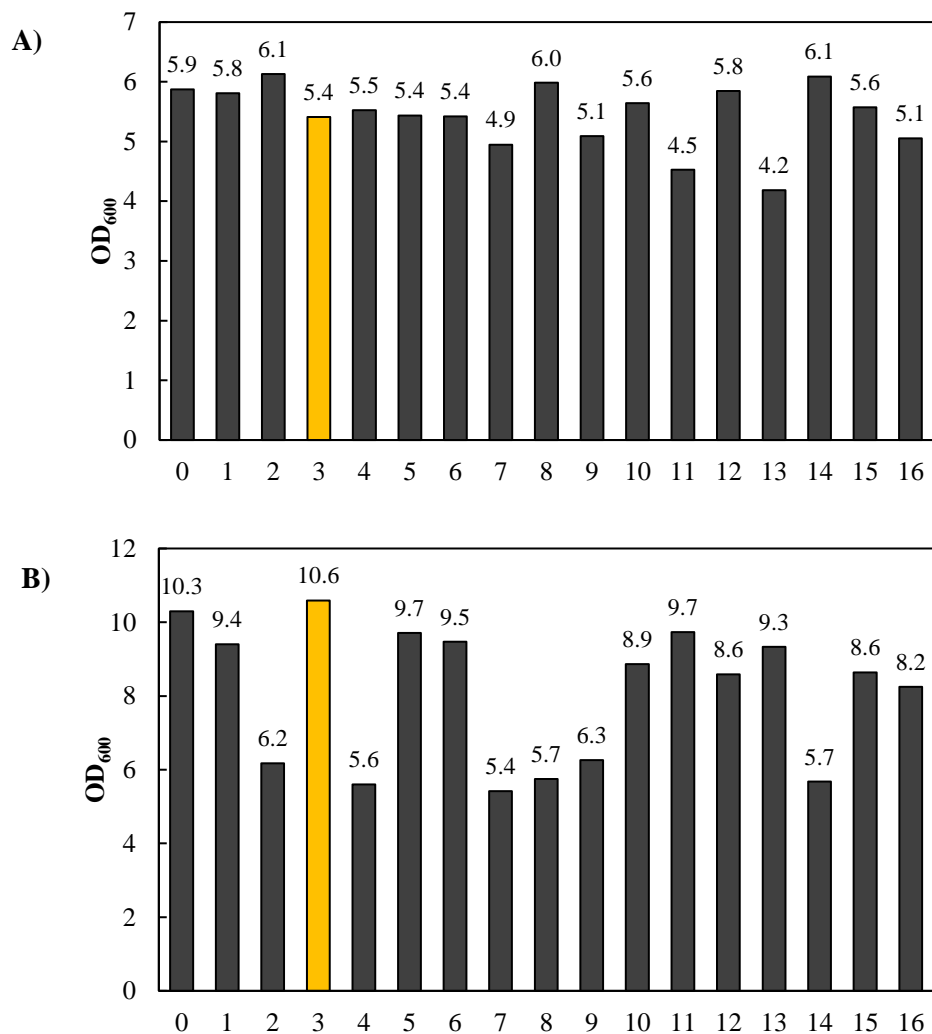

**Fig. S2**

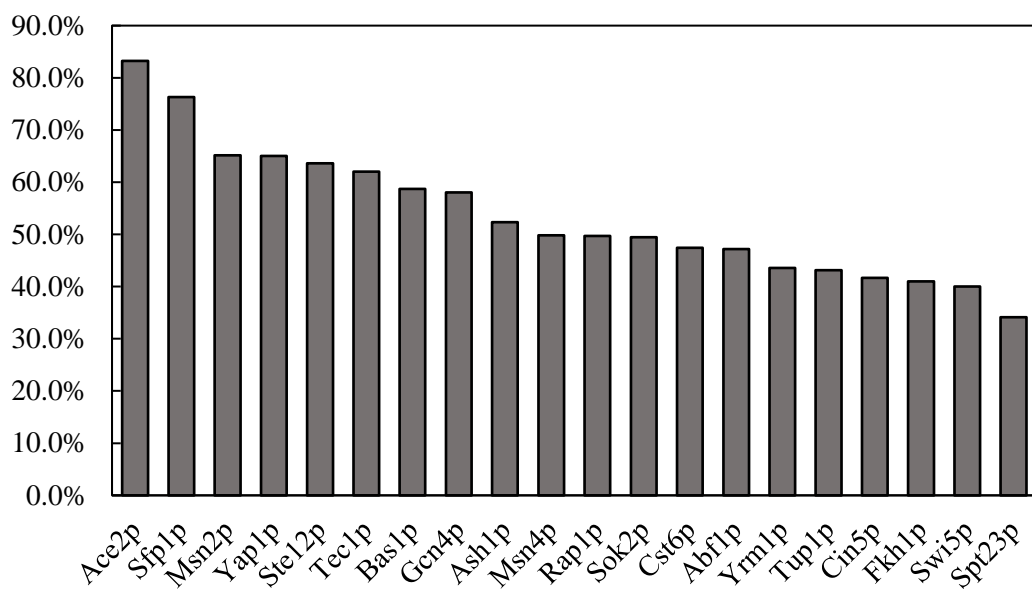

**Fig. S3**

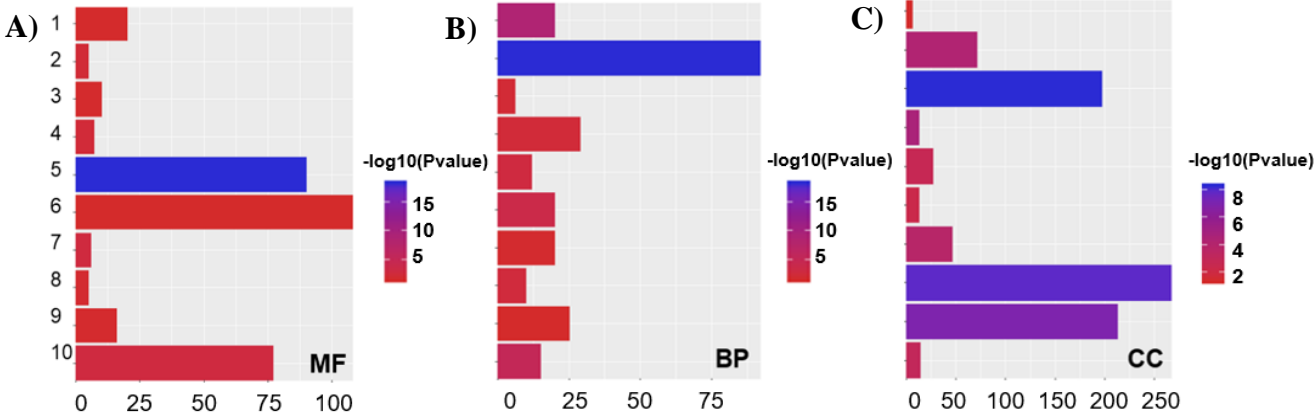

Fig. S4

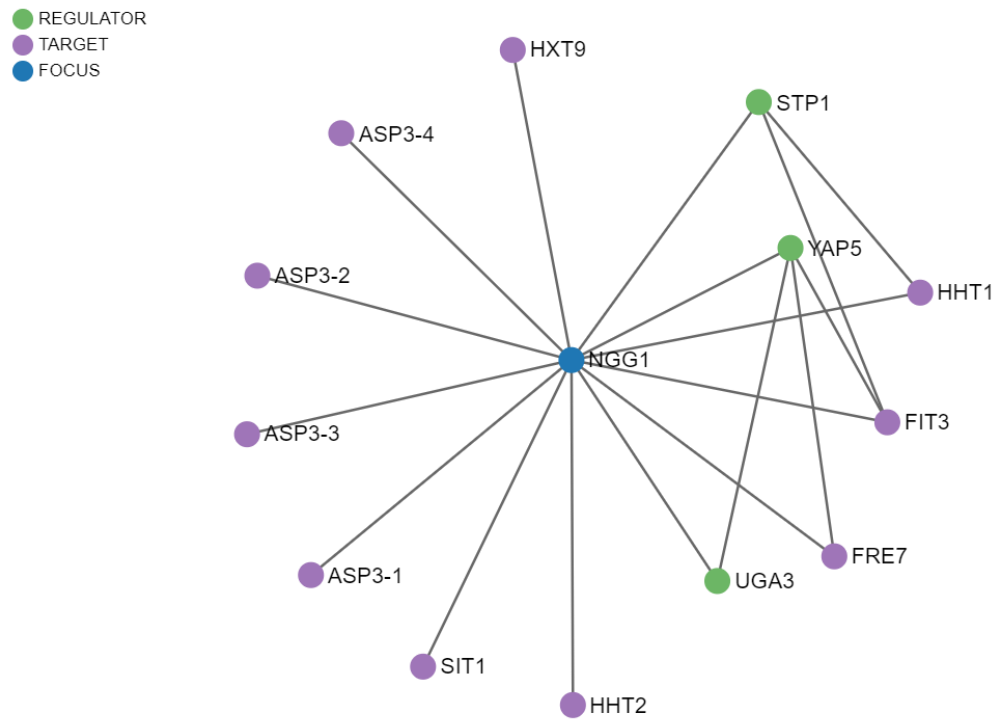

**Fig. S5**
